1 **Title:**

2 **Stable association of a Drosophila-derived microbiota with its animal partner and the**  
3 **nutritional environment upon transfer between populations and generations**

4

5

6 **Authors:** Mélisandre A. Téfit<sup>1</sup>, Benjamin Gillet<sup>1</sup>, Pauline Joncour<sup>1</sup>, Sandrine Hughes<sup>1</sup> and  
7 François Leulier<sup>1,\*</sup>

8

9 <sup>1</sup>Institut de Génomique Fonctionnelle de Lyon, Université de Lyon, Ecole Normale Supérieure  
10 de Lyon, Centre National de la Recherche Scientifique, Université Claude Bernard Lyon 1,  
11 Unité Mixte de Recherche 5242, 69364 Lyon, Cedex 07, France

12 **\*Correspondence:** francois.leulier@ens-lyon.fr

13

14

15

16

17

18

19 **Keywords**

20 Drosophila – Microbiota – Nutritional environment

21

22

23 **Abstract**

24

25 In the past years, the fruit fly *Drosophila melanogaster* has been extensively used to study  
26 the relationship between animals and their associated microbes. Compared to the one of wild  
27 populations, the microbiota of laboratory-reared flies is less diverse, and comprises fewer  
28 bacterial taxa; nevertheless, the main commensal bacteria found in fly microbiota always  
29 belong to the *Acetobacteraceae* and *Lactobacillaceae* families. The bacterial communities  
30 associated with the fly are environmentally acquired, and the partners engage in a perpetual  
31 re-association process. Adult flies constantly ingest and excrete microbes from and onto their  
32 feeding substrate, which are then transmitted to the next generation developing within this  
33 shared habitat. We wanted to analyze the potential changes in the bacterial community  
34 during its reciprocal transfer between the two compartments of the niche (i.e. the fly and the  
35 diet). To address this question, we used a diverse, wild-derived microbial community and  
36 analyzed its relationship with the fly population and the nutritive substrate in a given habitat.  
37 Here we show that the community was overall well maintained upon transmission to a new  
38 niche, to a new fly population and to their progeny, illustrating the stable association of a  
39 *Drosophila*-derived microbiota with its fly partner and the nutritional environment. These  
40 results highlight the preponderant role of the nutritional substrate in the dynamics of  
41 *Drosophila*/microbiota interactions, and the need to fully integrate this variable when  
42 performing such studies.

43

## 44 1. Introduction

45

46 Thanks to its ease of manipulation and genetic tractability, the fruit fly *Drosophila*  
47 *melanogaster* has been used as a model organism for more than a century (Kohler 1994;  
48 Sang 2001). Like all other animal species, *Drosophila* have been living and evolving in close  
49 association with microorganisms (McFall-Ngai et al. 2013), and such partnership impact  
50 various traits of the fly partner's physiology including growth, developmental timing, stress  
51 resistance, immune response, metabolism, lifespan and behavior (Brummel et al. 2004; Ryu  
52 et al. 2008; Sharon et al. 2010; Shin et al. 2011; Guo et al. 2014; Petkau et al. 2014; Venu et  
53 al. 2014; Wong et al. 2014; R. I. Clark et al. 2015; Téfit & Leulier 2017). Most of the functional  
54 studies on *Drosophila*-microbiota interaction are based on manipulating gnotobiotic animals  
55 generated through the association of germ-free animals with one to five cultured commensal  
56 bacterial strains. Although not as complex as the one of mammals, the microbiota of  
57 laboratory-reared *Drosophila* generally comprises up to twenty community members  
58 (Broderick & Lemaitre 2012; Erkosar et al. 2013). The exact microbiota composition may vary  
59 across studies, but some common features dominate. For example, the represented species  
60 differ, but the community diversity is quite low at the higher taxonomic levels and the most  
61 represented bacteria always belong to the *Acetobacteraceae* and *Lactobacillaceae* families  
62 (Staubach et al. 2013; Ma et al. 2015). Furthermore, analyses of the communities associated  
63 with wild-caught *Drosophila* populations confirmed the low diversity of bacterial taxa  
64 identified. Indeed, *Enterobacteriaceae* and *Acetobacteraceae* families, as well as the  
65 *Lactobacillales* order represent the major components of the "wild" flies microbiota (Chandler  
66 et al. 2011; Staubach et al. 2013). In addition, many rare taxa are found in wild populations  
67 (such as *Erwinia*, *Pantoea* or *Gluconobacter*) and their identity vary among studies (Chandler  
68 et al. 2011; Staubach et al. 2013).

69

70 In the wild, *Drosophila melanogaster* lives and feeds on rotting fruits, which represent an  
71 eminently microbe-rich environment. Fruit flies thus constantly ingest and excrete  
72 microorganisms which in turn (re-)colonize the niche and will then be transmitted to the next  
73 generation (Erkosar et al. 2013). In laboratory settings, the situation is similar since flies are  
74 reared in vials, a closed environment in which this colonization cycle also takes place. With  
75 the advance of the *Drosophila* microbiota research field, the idea of a resident, stable and  
76 defined microbiota of the fly has been challenged (Wong et al. 2013). Indeed, so far there is  
77 no published evidence supporting the existence of bacterial species that persistently reside  
78 within the fly gut, and are different than the ones encountered in the immediate environment

79 of the animal. The relationship between the fly and its microbiota appears to be more  
80 transient and highly dependent on the nutritive substrate on which *Drosophila* develops and  
81 lives (Sharon et al. 2010; Chandler et al. 2011; Staubach et al. 2013). These observations  
82 highlight the importance to consider the fly niche as a whole (i.e. including its nutritional  
83 substrate) when studying the interaction between the fruit fly and its associated bacteria.

84

85 To investigate the relationship between *Drosophila*, its microbiota and the nutritional  
86 substrate, we surveyed the dynamics of the structure and composition of a bacterial  
87 commensal community. We wanted to analyze the potential changes in the bacterial  
88 community during its reciprocal transfer between the two compartments of the niche (i.e. the  
89 fly and the diet). Ultimately, we were interested in understanding whether the environmental  
90 niche comprises one common bacterial community shared between both compartments, or  
91 rather sub-communities associated with either the flies or the nutritive substrate. To this end,  
92 we established the profile of the bacterial communities associated with flies and with their  
93 diet and observed that the flies did not seem to actively select for or against specific bacterial  
94 orders or families. Indeed, despite minor fluctuations in the bacterial taxa representation,  
95 there was a high degree of similarity between the composition of the bacterial community  
96 associated with the flies and the one of the community in the diet. Additionally, the  
97 community was overall well maintained upon transmission to a new habitat, to a new fly  
98 population and to their progeny. Taken together, the results of this study illustrate the stable  
99 association of a *Drosophila*-derived microbiota with both its animal partner and the nutritional  
100 environment and highlight the need to take into account the role of the diet when studying the  
101 interaction between *Drosophila* and its microbiota.

102

## 103 **2. Material and methods**

104

### 105 **2.1. Fly stocks and husbandry**

106 Laboratory-reared and wild-caught *Drosophila* populations were used in this study, both  
107 carrying the bacterial endosymbiont *Wolbachia*. Laboratory-reared *y,w* flies were kept on a  
108 standard yeast/cornmeal diet containing for 1L: 50g inactivated yeast (Bio Springer,  
109 Springaline BA95/0-PW), 80g cornmeal (Westhove, Farigel maize H1), 10g agar (VWR, ref.  
110 #20768.361), 5.2g methylparaben sodium salt (referred to as Moldex, MERCK, ref. #106756)  
111 and 4ml 99% propionic acid (CARLO ERBA, ref. #409553). Wild-caught flies were collected  
112 from rotten tomatoes in a garden in Solaize (France) and reared on a yeast-sucrose diet  
113 devoid of chemicals (YS-), and containing for 1L: 15g inactivated yeast, 25g sucrose (Sigma  
114 Aldrich, ref. #84100), 80g cornmeal and 10g agar. For the experiments, this diet was  
115 supplemented with 2.5ml 99% propionic acid and the quantity of yeast was decreased to  
116 10g/L (YSexp). All experimental flies were kept in incubators at 25°C, with a 12h/12h  
117 light/dark cycle.

118

### 119 **2.2. Generation of axenic *Drosophila* stocks**

120 To generate axenic flies, eggs were collected overnight and treated in sterile conditions with  
121 successive 2 minutes baths of bleach and 70% ethanol. Bleached embryos were then rinsed  
122 in sterile water for another 2 minutes and placed on sterile standard diet supplemented with  
123 an antibiotic cocktail (50µg ampicillin, 50µg kanamycin, 50µg tetracycline and 15µg  
124 erythromycin per liter of fly diet). Emerging adults were tested for axenicity by crushing and  
125 plating of the fly lysate on different bacterial culture media. The absence of *Wolbachia*  
126 contamination in the axenic stocks was confirmed by PCR, using the following general or  
127 strain specific primer pairs:

128

129 - WolbFWD: 5' - TGGTCCAATAAGTGATGAAGAAAC - 3'

130 - WolbREV: 5' - AAAAATTAAACGCTACTCCA - 3'

131 - WSP81FWD: 5' - TTGTAGCCTGCTATGGTATAACT - 3'

132 - WSP691REV: 5' - GAATAGGTATGATTTTCATGT - 3'

133

134 Germ-free flies were kept on antibiotic diet for a few generations and conventionally reared  
135 stocks were used to generate new axenic stocks regularly.

136

137

138

### 139 **2.3. Wild microbiota inoculation and samples collection**

140 Twenty-five males from the wild-caught population were put in a cage to seed sterile YSexp  
141 diet (contained in a Ø60mm petri dish) with their microbiota. After 4 days, fly and diet  
142 samples were retrieved from the cage and treated separately: on one hand, 4 replicate  
143 groups of 10 flies were crushed in 500µL sterile PBS and on the other hand, for each cage, 3  
144 replicates of 250mg of microbes-seeded diet were crushed in 1mL of sterile PBS. 50µL of  
145 each diet resuspension replicate was collected in order to assess the microbial diversity of  
146 the diet at the beginning of the experiment. These aliquots were pooled and 50µL of the  
147 resulting mix were then used to inoculate fresh sterile YSexp diet in a Ø1.5cm fly tube. 5 to  
148 10 days old axenic *y,w* adults were added in these tubes and left to lay eggs on the  
149 inoculated diet. After 4 days, the ex-axenic adults were collected and crushed in sterile PBS.  
150 Their progeny was then left to develop on the wild microbiota-inoculated YSexp diet and after  
151 two weeks triplicate fly and diet samples were collected. The whole experiment was  
152 conducted in duplicate (**Figure 3**).

153

### 154 **2.4. DNA extraction, amplification and sequencing**

155 Using the UltraClean® Microbial DNA Isolation Kit (MO BIO Laboratories, Carlsbad, CA,  
156 USA), DNA was isolated from all the samples collected during the wild microbiota inoculation  
157 experiment following the manufacturer's instructions. For experiments on the conventionally  
158 reared *y,w* stock, DNA was isolated from 5 to 10 days old flies with a protocol adapted from  
159 (Wong et al. 2013). Groups of 10 flies (5 females + 5 males) were homogenized in 300µL  
160 lysis buffer (20mM Tris-HCl, pH8, 2mM sodium EDTA, 1.2% Triton-X100, 20mg/mL  
161 lysozyme) by bead beating on a Precellys24 Sample Homogenizer (Bertin Instruments;  
162 6500rpm, 2x30 seconds) and incubated at 37°C for 90 minutes, with another round of bead-  
163 beating at 45 minutes. 300µL 2X extraction buffer (400mM Tris-HCl, pH8.5, 500mM NaCl,  
164 50mM EDTA) were added, together with 20µL 20% SDS and 15µL proteinase K (20mg/mL).  
165 Samples were then incubated overnight at 42°C, fly tissues debris were removed by phenol-  
166 chloroform treatment and DNA precipitated with 1:10 volume of 3M sodium acetate. The  
167 supernatant was mixed with 2.5 volumes of ice-cold 100% ethanol and incubated at -20°C for  
168 15 minutes before centrifugation at 4°C for 30 minutes and at 15000g. After discarding the  
169 supernatant, each pellet was washed in 1mL ice-cold 70% ethanol, dried and resuspended in  
170 20µL low TE buffer. The variable region V3 of the 16S rRNA bacterial gene was amplified by  
171 PCR using the primers 338F and 700R (Wang & Qian 2009). Barcode sequences, taken  
172 from Hamady et al. (2008), were added 5' of each reverse and forward primers for

173 subsequent multiplexing of the samples in the sequencing approach (**Table 1**). PCR  
174 products were processed for sequencing with the Ion Torrent™ Personal Genome Machine®  
175 (PGM) system (Thermo Fisher Scientific Inc.). PCR mixes were prepared in a dedicated  
176 room where no DNA is manipulated and DNA extracts were subsequently added in a room  
177 where no amplified DNA is present. Both rooms were decontaminated by UV lights and all  
178 surfaces under hoods were cleaned with DNA-ExitusPlus (PanReac, AppliChem) between  
179 each work session. Various controls were added to the experiments to monitor possible  
180 bacterial contamination at different steps (mock extraction, negative and aerosol PCR  
181 controls). PCR reactions were performed in 25  $\mu$ l using the Environmental Master Mix 2.0  
182 (Thermo Fisher Scientific) and 0.25 $\mu$ M of each primer with the following PCR program: 10  
183 minutes at 94°C, 35 cycles at 94°C 40 seconds, 55°C 40 seconds and 72°C 1 minute, with a  
184 final extension step à 72°C for 7 minutes. PCR product purification was carried out according  
185 to the manufacturer (Nucleospin Gel and PCR Clean-up, Macherey Nagel) and amplicons  
186 were eluted in 30 $\mu$ l of NE buffer. Equimolar amounts of the purified amplicons were used to  
187 create a unique library using the protocol Preparing Short Amplicon (<350pb) Libraries Using  
188 the Ion Plus Fragment Library Kit. Quantitation and quality assessment of library was  
189 performed on 2200 TapeStation analyzer using the High Sensitivity D1000 ScreenTape kit  
190 (Agilent Technologies). The library was subsequently processed with the Ion PGM Template  
191 OT2 HiQ 400 Kit and sequenced with the Ion Torrent PGM on a 316v2 chip using the Ion  
192 PGM HiQ Sequencing Kit.

193

## 194 **2.5. Processing of the sequencing data and analysis**

195 Reads obtained from the sequencing were demultiplexed and sorted by sample of origin  
196 based on the barcodes used. Using the Cutadapt software (Martin 2011), reads were then  
197 trimmed to remove barcodes and primers sequences and those inferior to 200bp were  
198 discarded. At this point, all reads were merged into a single fasta file for downstream  
199 analyses, with their sample identification available in a separate group file. Pooled reads  
200 were processed with the Mothur program, version 1.34.4 (Schloss et al. 2009) following the  
201 pipeline *Ion Torrent sequence analysis using Mothur* contributed to the Mothur community by  
202 Sukithar Rajan. Reads were aligned against the SILVA database alignment file (release 123).  
203 Alignment result was screened and poorly aligned sequences were filtered out. Chimeric  
204 sequences were also identified and removed from the file before classification with the SILVA  
205 taxonomic outline. Taxonomy files were then analyzed using custom R scripts to calculate  
206 the frequencies of each taxonomic level of interest in the samples. Additionally, when  
207 present, the frequencies of taxons observed in the controls samples were subtracted from

208 the corresponding frequencies in the experimental samples. The controls correspond to the  
209 sequencing of DNA extraction and PCR amplification reagents, without any tissue or DNA  
210 added. They were processed together with the experimental samples to monitor the potential  
211 environmental contaminations often encountered in this type of studies (Salter et al. 2014).  
212 The frequency tables were then used to generate barplot graphs describing the taxonomic  
213 composition of the samples. Only taxa for which the frequency is above 1% are represented  
214 on the graphs.

215

## 216 **2.6. Statistical analyses**

217 Data were analyzed using R and Rstudio (versions 3.1.2 and 0.98.1091 respectively), to  
218 generate barplot graphs. For the statistical analyses, type III ANOVAs have been performed  
219 to test the combined effect of the three factors on alpha-diversity and proportion of bacteria.  
220 When the effects were significant, pairwise-t-tests were used to compare between  
221 combinations of modalities. To cluster the samples based on similarities in bacteria  
222 composition, principal component analyses and hierarchical clustering have been performed  
223 with the FactoMineR package. The number of clusters for the hierarchical clustering has  
224 been chosen based on a drop in inertia gain.

225



## 226 **3. Results**

227

### 228 **3.1. Low diversity of the bacterial community associated with a *Drosophila* stock**

229 To determine whether the diversity of the community associated with our laboratory  
230 reference stock *yellow,white* (*y,w*) was suitable for a community dynamics study, we first  
231 assessed its composition. We performed the profiling of the microbiota of conventionally  
232 reared *y,w* flies with 16S-based sequencing. Briefly, the V3 variable region of the bacterial  
233 16S ribosomal RNA gene was amplified and the resulting amplicons were sequenced with an  
234 Ion Torrent<sup>TM</sup> PGM system. We obtained over 2.5 millions of reads that were then processed  
235 to identify the bacterial taxa (see section 2. Material and Methods section for a detailed  
236 description of the sequencing protocol and analysis pipeline). The sequencing results  
237 showed a preponderance of the *Lactobacillales* order, together with a minor representation of  
238 *Rickettsiales* and *Corynebacteriales* (**Figure 1A**). This low diversity of bacterial orders was  
239 further confirmed at the family and genus levels (**Figure 1B and C**). Indeed, the  
240 *Lactobacillus*, *Wolbachia* and *Corynebacterium* genera were almost the sole representatives  
241 of their respective orders. Only in the case of *Lactobacillales* was there another member of  
242 the order represented; *Enterococcus* bacteria were also present in the samples but at a  
243 much lower frequency (**Figure 1C**). This description is based on the analysis of three  
244 biological replicates pooled together. It nonetheless holds true when the three replicates are  
245 analyzed separately (**Figure S1**).

246

247

### 248 **3.2. Preservatives contained in the fly diet dramatically impact the microbiota** 249 **diversity**

250 Given the very low complexity of the bacterial community associated with our conventionally  
251 reared *y,w* stock, we decided to search for a source of microbiota for our community  
252 dynamics study. Ideally, the starting bacterial community should be as diverse as possible to  
253 study the potential composition shifts occurring during its transfer between populations and  
254 generations. To maximize our chances to find flies with a diverse microbiota, we turned to the  
255 wild and collected *Drosophila* from rotting tomatoes. This population was composed of mostly  
256 *Drosophila melanogaster*, but the sorting of the flies was based just on physical features of  
257 *D. melanogaster* that are readily identifiable under a dissecting scope; therefore we cannot  
258 completely rule out the possibility that other visually resembling species were also present in  
259 the wild-derived population.

260

261 In the laboratory, we kept the wild-derived population on a preservative-free diet containing  
262 inactivated yeast and sucrose (YS- diet), a diet designed to favor the maintenance of  
263 bacterial diversity. In our initial effort to associate the wild-derived microbiota with axenic *y,w*  
264 eggs, we systematically faced invasive microbial contamination of the medium (likely of  
265 fungal origin) and subsequent death of the embryos and/or larvae. We therefore decided to  
266 reintroduce preservatives to the experimental diet, in a parsimonious manner. Our laboratory  
267 diets usually contain two chemicals serving as preserving agents: propionic acid and  
268 methylparaben sodium salt, referred to as Moldex (see section 2. Material and Methods  
269 section for detailed composition of the fly diet). To determine which of these two chemicals  
270 have the lowest impact on the bacterial diversity, we prepared YS- diets supplemented with  
271 propionic acid, Moldex or both. Wild-derived flies were placed on these diets and after  
272 several generations, a few adults from each sub-population were crushed and their lysate  
273 spread on different bacterial culture media. We observed that both chemicals prevented the  
274 invasive microbial contamination in the diet. However, the nature of the chemicals used in the  
275 diet fed to the flies had a major impact on the diversity of their microbiota (**Figure 2**). Indeed,  
276 compared to that of flies reared on the YS- diet, the microbial diversity associated with flies  
277 fed a diet containing both propionic acid and Moldex was greatly reduced, as indicated by the  
278 low number and uniform shapes of the colonies growing on the plates. Between the two  
279 mono-chemical diets, the one containing only propionic acid seemed to preserve a better  
280 diversity than the Moldex-only one; the profile of microbial communities growing on plate  
281 after propionic acid-only treatment was more similar to the one obtained from the YS- diet.  
282 For subsequent experiments we therefore used a yeast/sucrose diet containing a low dose  
283 (2,5ml/L as compared to 4ml/L in our regular fly diet) of propionic acid as preservative  
284 (YSexp diet).

285

286

### 287 **3.3. Bacterial communities in the flies and in its diet are similar**

288 To study the relationship between bacterial communities associated with flies and with their  
289 nutritive substrate, we used the wild-derived *Drosophila* population described above as a  
290 “natural” microbiota provider. The experiment was performed in duplicate, as described in the  
291 scheme on **Figure 3**. Statistical analyses showed that there was no significant effect of the  
292 experimental factors (the experimental repeat, the nature of the sample or the level in the  
293 protocol) on the alpha-diversity of the bacterial communities at both the order and the family  
294 level (**Table 2**). Only a weak three-way interaction of the factors was detected as statistically  
295 significant ( $p=0.047648$ ) and only at the order level (**Table 2**). We thus considered the effect

296 of the experimental repeat on the bacterial composition as negligible and we decided to pool  
297 the results of the two technical replicates for further analyses as a means to increase the  
298 statistical power of our study.

299  
300 Founder males were placed in cages for four days to seed the YSexp diet with the  
301 commensal bacteria they carried. As expected, after four days the bacteria had colonized this  
302 previously sterile diet. The presence of *Wolbachia* was detected only in the wild founder  
303 males and not on the diet (**Figure 4**). This intracellular symbiont is indeed often found in fly  
304 populations, both in laboratory stocks and in the wild (Hoffmann et al. 1994; M. E. Clark  
305 2005), and is transmitted vertically from mother to progeny. Its presence in the wild-derived  
306 population had been determined by PCR prior to this study (**Figure S2**), and was confirmed  
307 with the 16S profiling data. Given its lifestyle and transmission mode, it is not surprising that  
308 *Wolbachia* is only found in the initial wild-derived fly samples and not in subsequent diet  
309 samples. Indeed, this protocol was based on a strict horizontal transmission of bacterial  
310 communities (i.e. via the diet). Consistently, the *y,w* stock was originally axenic and devoid of  
311 *Wolbachia*, therefore the endosymbiont was absent from the *y,w* parents and progeny  
312 samples. Since the experimental set-up induced a bias towards *Wolbachia* bacteria and  
313 prevented their transmission, the corresponding taxa (i.e. *Rickettsiales* order and  
314 *Anaplasmataceae* family) were excluded from all statistical analyses.

315  
316 In the founder male flies samples *Lactobacillales* were the most represented bacterial order,  
317 followed by *Enterobacteriales* and *Rhodospirillales* at similar frequencies (**Figure 4A, left**  
318 **panel**). The hierarchy was different in the samples of YSexp diet seeded by these wild  
319 founders, with *Rhodospirillales* here being the main taxon (**Figure 4B, left panel**).  
320 Additionally, within the *Lactobacillales* order several families were present and for some the  
321 ranking was modified between the wild founders flies and diet samples (**Figure 4A and B,**  
322 **right panels**). Indeed, *Lactobacillaceae* that were originally ranked 8<sup>th</sup> in the flies samples  
323 became the third most represented family in the diet samples. The position of the other  
324 members of the *Lactobacillales* order was either maintained (as for *Leuconostocaceae* and  
325 *Streptococcaceae*) or lowered (as for *Enterococcaceae* that fell below the cutoff of 1% of  
326 relative proportion in the diet samples).

327  
328 The diet seeded by the wild-derived males was then used to inoculate fresh YSexp diet, and  
329 axenic (germ-free (GF); devoid of microbiota) *y,w* flies were placed on this bacteria-  
330 containing diet afterwards. After three days, the ex-GF flies were removed and their

331 associated microbiota analyzed. Once again, the same three bacterial orders were found to  
332 dominate the community associated with these flies (*Lactobacillales*, *Rhodospirillales* and  
333 *Enterobacteriales* (**Figure 4C, left panel**). Strikingly, even though directly originating from it,  
334 the hierarchy of the bacterial orders represented in the community associated with *y,w*  
335 parents was modified compared to the one of wild founders diet; here *Lactobacillales* were by  
336 far the most represented taxon. This was mainly due to a burst in the representation of  
337 bacteria from the *Streptococcaceae* family, which was the main taxon in the *y,w* parents  
338 samples. The second and third most represented families were the other *Lactobacillales*  
339 representatives from the wild founders diet samples, namely *Lactobacillaceae* and  
340 *Leuconostocaceae* (**Figure 4C, right panel**).

341  
342 After removal of their parents, the eggs laid by the ex-GF *y,w* flies were left to develop  
343 without manipulation, on the diet originally containing bacterial populations described in  
344 **Figure 4B**. When we analyzed the profile of the bacterial community associated with the *y,w*  
345 progeny, we found again the three same major orders, *Rhodospirillales*, *Lactobacillales* and  
346 *Enterobacteriales* (**Figure 4D, left panel**). Here the ranking of the bacterial taxa was the  
347 same as that seen in the wild founders diet samples, with *Rhodospirillales* as the dominant  
348 order. In their associated diet however, the community was enriched in *Enterobacteriales*  
349 bacteria, which were now the main order represented (**Figure 4E, left panel**). Since the  
350 *Rhodospirillales* and *Enterobacteriales* orders are represented each by a unique family in this  
351 study, it is unsurprising that the predominant bacterial families in the *y,w* progeny flies and  
352 diet samples were *Acetobacteraceae* and *Enterobacteraceae* (**Figure 4D and E, right**  
353 **panels**).

354  
355 Although the three major orders represented remained the same (namely *Enterobacteriales*,  
356 *Lactobacillales* and *Rhodospirillales*), the profile of the wild-derived bacterial community was  
357 slightly modified across samples through the experiment (**Figure 4**). Among the represented  
358 taxa, the proportion of some bacterial orders was significantly different among the distinct  
359 sample types, notably the *Enterobacteriales*, *Flavobacteriales* and *Lactobacillales* orders  
360 (**Figure 5A**). This was further highlighted at the family level, with *Enterobacteraceae*  
361 (*Enterobacteriales*), *Flavobacteriaceae* (*Flavobacteriales*) and *Enterococcaceae* and  
362 *Streptococcaceae* (*Lactobacillales*) being significantly differentially represented through the  
363 experiment (**Figure 5B**). However these observations do not correspond to a pattern that  
364 would support the specific association of particular bacterial taxa with a given type of sample.  
365 Furthermore, as previously mentioned, the global statistical analyses performed on all

366 experimental samples showed no significant effect of either the nature (fly/diet) or the level  
367 (wild founders/*y,w* parents/*y,w* progeny) of the samples (**Table 2**). This was further confirmed  
368 when we carried out principal component analyses to cluster samples according to the  
369 similarities in their community profile both at the order and family levels (**Figure 6A-C left**  
370 **and right panels** respectively). Indeed, such analyses revealed that neither the type of  
371 sample, the level of the experiment or the experimental replicate considered could explain  
372 the differences observed among the samples (**Figure 6 and Table 3**).  
373

#### 374 4. Discussion & Conclusions

375

376 In order to determine if our reference *yellow white* stock could serve as a microbiota-provider,  
377 we first analyzed the composition of the bacterial community associated with this fly  
378 population and found it to be poorly diverse. Besides *Wolbachia*, the *y,w* stock was  
379 associated with only three bacterial genera (*Corynebacterium*, *Enterobacter* and  
380 *Lactobacillus*), and among them, the *Lactobacillus* genus was by far the most represented.  
381 This result was reminiscent of those published by Sharon and colleagues who reported the  
382 effect of the microbiota on assortative mating. In this particular study, switching flies from a  
383 molasses-based diet to a starch-based diet dramatically impacted the bacterial diversity  
384 associated with their fly stock, which ended up becoming mono-associated with *Lactobacillus*  
385 *plantarum* (Sharon et al. 2010). In our case, the *y,w* stock tested is also reared on a starch-  
386 based diet, since cornmeal is the main carbohydrate source in our standard fly diet, which  
387 might at least in part explain the low bacterial diversity. Moreover, bacteria from the genus  
388 *Acetobacter* (another taxa known as a major fly commensal) thrive mainly on simple sugars,  
389 which could explain their absence from this community. Another feature of the fly diet  
390 composition could also explain the reduced bacterial diversity of the microbiota associated  
391 with our *y,w* stock: in addition to being starch-based, the diet routinely used in our laboratory  
392 contains Moldex and propionic acid, two chemicals commonly added as preservatives in fly  
393 diet recipes. The very purpose of these chemicals is to prevent diet spoilage by antagonizing  
394 microbial development (mostly fungal). In this light it is anticipated that they might also hinder  
395 the growth of commensal bacteria, thus reducing the microbial diversity of laboratory-reared  
396 fly stocks.

397

398 To perform this bacterial dynamics study, we aimed to start with as much bacterial diversity  
399 as possible. First because we thought it would increase the chances to observe potential  
400 shifts in the community composition, and secondly to make our setup closer to a natural  
401 setting. Indeed, it has been previously shown that the diversity of wild populations' microbiota  
402 was increased compared to that of laboratory-reared flies (Chandler et al. 2011; Staubach et  
403 al. 2013). We thus decided to turn to the wild to find our starting microbial community. This  
404 population allowed us to confirm the adverse effect of Moldex and propionic acid on  
405 commensal bacterial diversity. Furthermore, in our setup, Moldex seemed to have the  
406 strongest impact on microbiota composition and drastically reduced the diversity of microbial  
407 communities associated with the fly population. We therefore designed a diet deprived of

408 Moldex and containing a reduced amount of propionic acid for our study in order to sustain  
409 diversity of the fly microbiota.

410  
411 As shown by the 16S-based profiling of their associated community, when kept in the  
412 laboratory on our diet designed to favor bacterial diversity (YS- diet), our wild-derived fly  
413 population indeed harbored a much more complex community than that of the *y,w* stock;  
414 even if the proportions were not strictly maintained, almost all bacterial taxa present in the  
415 wild founder males were transferred to the diet and to the *y,w* flies. In the graphical  
416 representation of the community profiles, we arbitrarily chose to represent only the taxa with  
417 a frequency proportion of 1% or above. This cutoff explains why certain taxa appearing in the  
418 wild founder males graphs are not present anymore in those describing the *y,w* samples;  
419 their proportion dropped below the 1% cutoff, hence their absence from the graphs (**Figure**  
420 **4**). One bacterial type, the *Flavobacteriales* order, was however enriched in the *y,w* samples.  
421 Indeed, in the wild founder flies and diet samples *Flavobacteriales* were underrepresented,  
422 with proportions of around 0.3% and 0.2% respectively while this proportion increased  
423 significantly in all *y,w* samples; *Flavobacteriales* were systematically found among the 4 most  
424 represented taxa, and above the 1% cutoff. Nevertheless, the 3 main orders always  
425 represented were the *Enterobacteriales*, *Lactobacillales* and *Rhodospirillales*, which were  
426 previously reported as major components of the fly microbiota. Indeed, even if the  
427 representative genera tend to vary across studies and populations, these higher taxonomic  
428 levels are almost always present (Chandler et al. 2011; Staubach et al. 2013).

429  
430 There was no significant distinction in the composition of the communities between the fly  
431 and the diet samples; no bacterial taxa were more, or singularly represented in one type of  
432 samples. Thus, the flies did not appear to actively select for or against certain bacteria, and  
433 the bacterial content of the flies was similar to that of the nutritive substrate. Nonetheless,  
434 this point could only be fully assessed by performing a complementary experiment, with the  
435 same initial set up of diet seeded by the wild founder flies, but without adding any flies  
436 subsequently. Such an experiment would allow us to study the dynamics of the bacterial  
437 community in a fly-free environment and to confirm the absence of effect of the flies on their  
438 microbiota composition. Interestingly in a recent study, Wong and colleagues performed this  
439 type of experiment and found that the presence of *Drosophila* promoted the maintenance of  
440 *Lactobacillus* bacteria in the niche. Furthermore, the presence of the fly partially protected  
441 *Lactobacilli* against the antagonistic effect of *Acetobacter*, which in a fly-free environment are  
442 taking over and in turn completely dominate the community (Wong et al. 2015). Surprisingly

443 however, these promoting and protective effects were observed only when flies were present  
444 at high densities, suggesting that whatever the underlying cause of this impact, the fly  
445 population needs to attain a critical mass to exert it. Additionally, such effects were revealed  
446 in a set of experiments using a poorly diverse microbiota, consisting of an artificial mixture of  
447 four bacterial species all belonging to the *Acetobacter* and *Lactobacillus* genera. These  
448 bacterial strains were originally derived from laboratory-reared fly stocks (Wong et al. 2013)  
449 and might have adapted to laboratory conditions and to manufactured fly diets. Their  
450 behavior might thus be very different from the dynamics of a natural microbiota.

451  
452 For the majority of the bacterial orders identified in this study, only one family was  
453 represented for each order. The *Lactobacillales* were the only exception, as  
454 *Lactobacillaceae*, *Leuconostocaceae* and *Streptococcaceae* families were represented  
455 **(Figure 4)**. Unsurprisingly, the relative proportions of the represented families followed those  
456 of their respective orders. We also analyzed the results at the genus level and drew the same  
457 conclusion (data not shown). The genera results are however less representative in this  
458 study since a considerable proportion of sequences were unclassified at this taxonomic level  
459 and thus excluded from our analysis. We cannot rule out that potential shifts in the  
460 community structure and composition could only be revealed at this taxonomic level or at the  
461 species one. Furthermore, it has been shown that different strains of the same bacterial  
462 species could have very different impacts (Storelli et al. 2011; Chaston et al. 2014), which  
463 highlights the importance of considering this taxonomic level as well. However, our 16S-  
464 based community profiling protocol is not amenable to such in-depth discrimination of  
465 bacterial taxa. Additionally, our study is restricted to the analysis of the first-degree progeny.  
466 It might be of interest to conduct such an analysis for a longer period of time and observe  
467 how the bacterial community dynamics changes with additional generations.

468  
469 All together, our results indicate that the microbiota of *Drosophila* is stably associated with  
470 the fly population and its nutritional substrate within a given environmental niche, and upon  
471 transfer between populations and generations. Adult flies seed their nutritive substrate with  
472 the microorganisms they initially carry, allowing the microbial community to establish and  
473 invade the niche. This microbiota thus remains associated with the fly population occupying  
474 this shared habitat and is transmitted to their progeny. At each generation, freshly hatched  
475 larvae associate and develop with the microbiota and each individual will later on facilitate  
476 the dispersal of their associated bacteria. Adult *Drosophila* will then migrate to new habitats,  
477 bringing along all or part of the initial bacterial community and seed new niches. This study



478 thus illustrates the stable association of a Drosophila-derived microbiota with both its animal  
479 partner and the nutritional environment and indicate that the nutritional substrate is an  
480 important microbiota habitat to integrate in Drosophila/microbiota studies.

481 **5. Annexes**

482

483 **5.1. Acknowledgments**

484 The authors would like to thank the Arthro-Tools platform of the SFR Biosciences  
485 (UMS3444/US8) for providing Drosophila husbandry materials, the IGFL sequencing platform  
486 for performing the deep sequencing experiments, Loan Bozonnet for fly diet preparation and  
487 Dali Ma for critical reading and edition of the manuscript.

488

489 **5.2. Competing interests**

490 The authors declare no conflict of interests.

491

492 **5.3. Authors contribution**

493 FL supervised the work. MT and FL designed the experiments and MT performed them. BG  
494 and SH designed the 16S-based profiling protocols. BG prepared the sequencing libraries  
495 and performed the sequencing. PJ and SH assisted MT for BioIT and BioStats analyses. MT,  
496 PJ, SH and FL analysed the results. MT wrote the manuscript with inputs from FL.

497

498 **5.4. Funding**

499 This work was funded by an ERC starting grant (FP7/2007-2013-N°309704). The lab is  
500 supported by the FINOVI foundation, the “Fondation Schlumberger pour l'Education et la  
501 Recherche” and the EMBO Young Investigator Program.

502

503 **6. References**

504

505 Broderick, N.A. & Lemaitre, B., 2012. Gut-associated microbes of *Drosophila*  
506 *melanogaster*. *Gut Microbes*, 3(4), pp.307–321.

507 Brummel, T. et al., 2004. *Drosophila* lifespan enhancement by exogenous  
508 bacteria. *Proceedings of the National Academy of Sciences of the United*  
509 *States of America*, 101(35), pp.1297–12979.

510 Chandler, J.A. et al., 2011. Bacterial communities of diverse *Drosophila*  
511 species: ecological context of a host-microbe model system. *PLoS*  
512 *Genetics*, 7(9), p.e1002272.

513 Chaston, J.M., Newell, P.D. & Douglas, A.E., 2014. Metagenome-wide  
514 association of microbial determinants of host phenotype in *Drosophila*  
515 *melanogaster*. *mBio*, 5(5), pp.e01631–14.

516 Clark, M.E., 2005. Widespread Prevalence of Wolbachia in Laboratory Stocks  
517 and the Implications for *Drosophila* Research. *Genetics*, 170(4), pp.1667–  
518 1675.

519 Clark, R.I. et al., 2015. Distinct Shifts in Microbiota Composition during  
520 *Drosophila* Aging Impair Intestinal Function and Drive Mortality. *Cell*  
521 *Reports*, 12(10), pp.1656–1667.

522 Erkosar, B. et al., 2013. Host-Intestinal Microbiota Mutualism: "Learning on the  
523 Fly". *Cell Host & Microbe*, 13(1), pp.8–14.

524 Guo, L. et al., 2014. PGRP-SC2 Promotes Gut Immune Homeostasis to Limit  
525 Commensal Dysbiosis and Extend Lifespan. *Cell*, 156(1-2), pp.109–122.

526 Hamady, M. et al., 2008. Error-correcting barcoded primers for  
527 pyrosequencing hundreds of samples in multiplex. *Nature Methods*, 5(3),  
528 pp.235–237.

529 Hoffmann, A.A., Clancy, D.J. & Merton, E., 1994. Cytoplasmic incompatibility  
530 in Australian populations of *Drosophila melanogaster*. *Genetics*, 136(3),  
531 pp.993–999.

532 Kohler, R.E., 1994. *Lords of the Fly: Drosophila Genetics and the*  
533 *Experimental Life*, The University of Chicago Press.

534 Ma, D. et al., 2015. Studying host-microbiota mutualism in *Drosophila*:  
535 Harnessing the power of gnotobiotic flies. *Biomedical Journal*, 38(4),  
536 pp.285–293.

537 Martin, M., 2011. Cutadapt removes adapter sequences from high-throughput

- 538 sequencing reads. *EMBnet.journal*, 17(1), p.10.
- 539 McFall-Ngai, M. et al., 2013. Animals in a bacterial world, a new imperative for  
540 the life sciences. In Proceedings of the National Academy of Sciences of  
541 the United States of America. pp. 3229–3236.
- 542 Petkau, K. et al., 2014. A Deregulated Intestinal Cell Cycle Program Disrupts  
543 Tissue Homeostasis without Affecting Longevity in *Drosophila*. *Journal of*  
544 *Biological Chemistry*, 289(41), pp.28719–28729.
- 545 Ryu, J.H. et al., 2008. Innate Immune Homeostasis by the Homeobox Gene  
546 Caudal and Commensal-Gut Mutualism in *Drosophila*. *Science*, 319(5864),  
547 pp.777–782.
- 548 Salter, S.J. et al., 2014. Reagent and laboratory contamination can critically  
549 impact sequence-based microbiome analyses. *BMC Biology*, 12(1), p.118.
- 550 Sang, J.H., 2001. *Drosophila melanogaster*: the fruit Fly E. C. R. Reeve, ed.  
551 *Encyclopedia of Genetics*.
- 552 Schloss, P.D. et al., 2009. Introducing mothur: open-source, platform-  
553 independent, community-supported software for describing and comparing  
554 microbial communities. *Applied and Environmental Microbiology*, 75(23),  
555 pp.7537–7541.
- 556 Sharon, G. et al., 2010. Commensal bacteria play a role in mating preference  
557 of *Drosophila melanogaster*. *Proceedings of the National Academy of*  
558 *Sciences of the United States of America*, 107(46), pp.20051–20056.
- 559 Shin, S.C. et al., 2011. *Drosophila* Microbiome Modulates Host Developmental  
560 and Metabolic Homeostasis via Insulin Signaling. *Science*, 334(6056),  
561 pp.670–674.
- 562 Staubach, F. et al., 2013. Host Species and Environmental Effects on Bacterial  
563 Communities Associated with *Drosophila* in the Laboratory and in the  
564 Natural Environment. *PLoS ONE*, 8(8), p.e70749.
- 565 Storelli, G. et al., 2011. *Lactobacillus plantarum* Promotes *Drosophila* Systemic  
566 Growth by Modulating Hormonal Signals through TOR-Dependent Nutrient  
567 Sensing. *Cell Metabolism*, 14(3), pp.403–414.
- 568 Téfit, M.A. & Leulier, F., 2017. *Lactobacillus plantarum* favors the early  
569 emergence of fit and fertile adult *Drosophila* upon chronic undernutrition.  
570 *Journal of Experimental Biology*.
- 571 Venu, I. et al., 2014. Social attraction mediated by fruit flies' microbiome.  
572 *Journal of Experimental Biology*, 217(8), pp.1346–1352.

- 573 Wang, Y. & Qian, P.-Y., 2009. Conservative Fragments in Bacterial 16S rRNA  
574 Genes and Primer Design for 16S Ribosomal DNA Amplicons in  
575 Metagenomic Studies D. Field, ed. *PLoS ONE*, 4(10), p.e7401.
- 576 Wong, A.C.-N. et al., 2015. The Host as the Driver of the Microbiota in the Gut  
577 and External Environment of *Drosophila melanogaster*. *Applied and*  
578 *Environmental Microbiology*, 81(18), pp.6232–6240.
- 579 Wong, A.C.-N., Chaston, J.M. & Douglas, A.E., 2013. The inconstant gut  
580 microbiota of *Drosophila* species revealed by 16S rRNA gene analysis. *The*  
581 *ISME Journal*, pp.1–11.
- 582 Wong, A.C.N., Dobson, A.J. & Douglas, A.E., 2014. Gut microbiota dictates  
583 the metabolic response of *Drosophila* to diet. *Journal of Experimental*  
584 *Biology*, 217(11), pp.1894–1901.
- 585
- 586

587 **Figures**

588

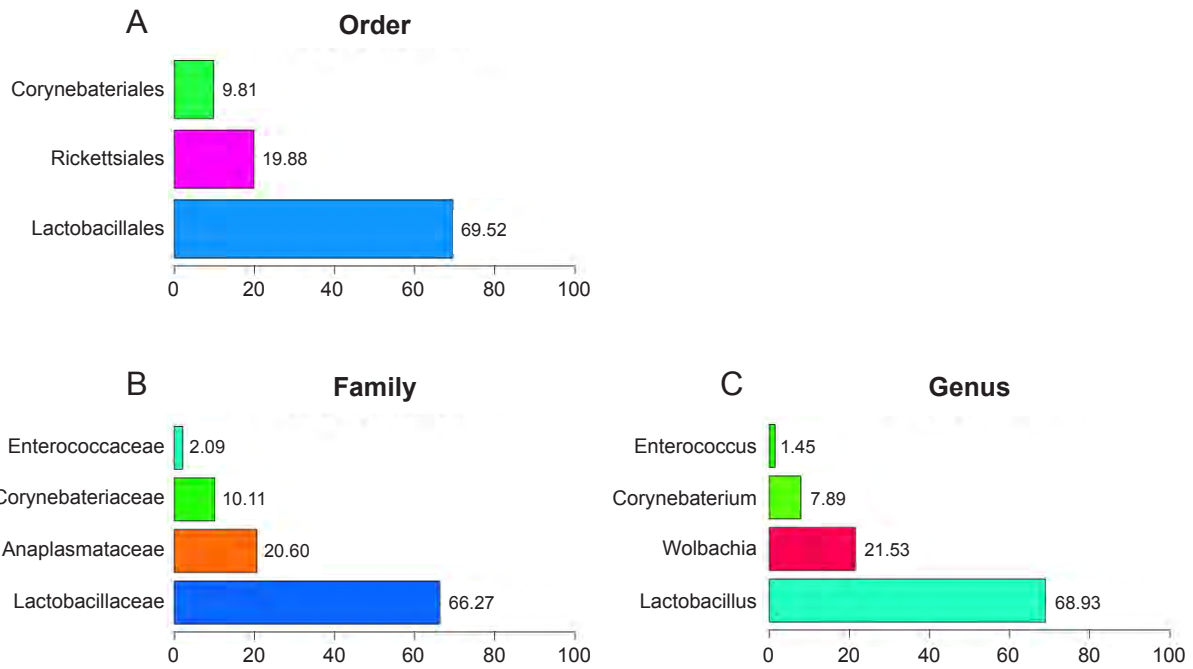

589

590 **Figure 1. Community profile of the yellow white stock microbiota.** Frequency of  
591 bacterial taxa present in the samples (pooled replicates). Taxonomic levels used: Order (A),  
592 Family (B) and Genus (C). Equivalent percentages are indicated next to the corresponding  
593 bars. Graphs only represent the taxa present at a frequency of 1% or above.

594

595

596

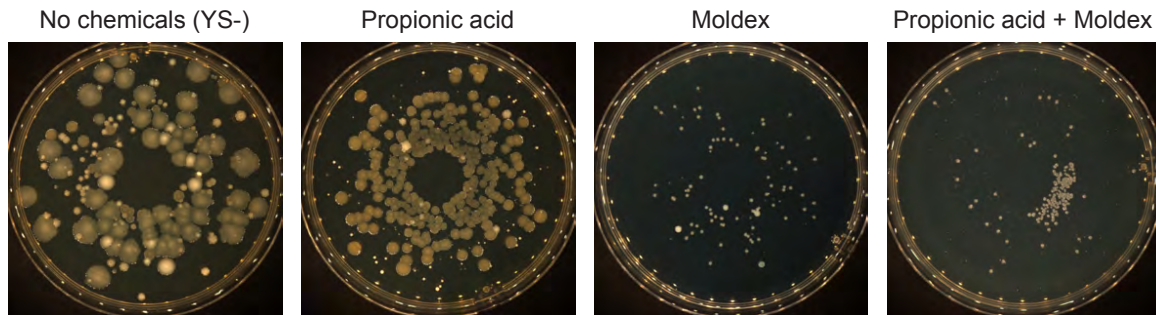

597

598

599 **Figure 2. Alteration of the microbial diversity by preservatives contained in the fly**

600 **diet.** Wild-derived flies were kept on either a diet without chemical (YS-) or on the same diet

601 supplemented with propionic acid, Moldex or both. After several generations, flies were

602 crushed and the lysates plated on different culture media. Pictures show representative

603 mannitol (Moldex diet and propionic acid + Moldex diet) or BHI (brain-heart infusion; YS- diet

604 and propionic acid diet) plates and illustrate the decrease in microbial diversity caused by the

605 introduction of chemicals in the fly diet, and more particularly the effect of Moldex.

606

607

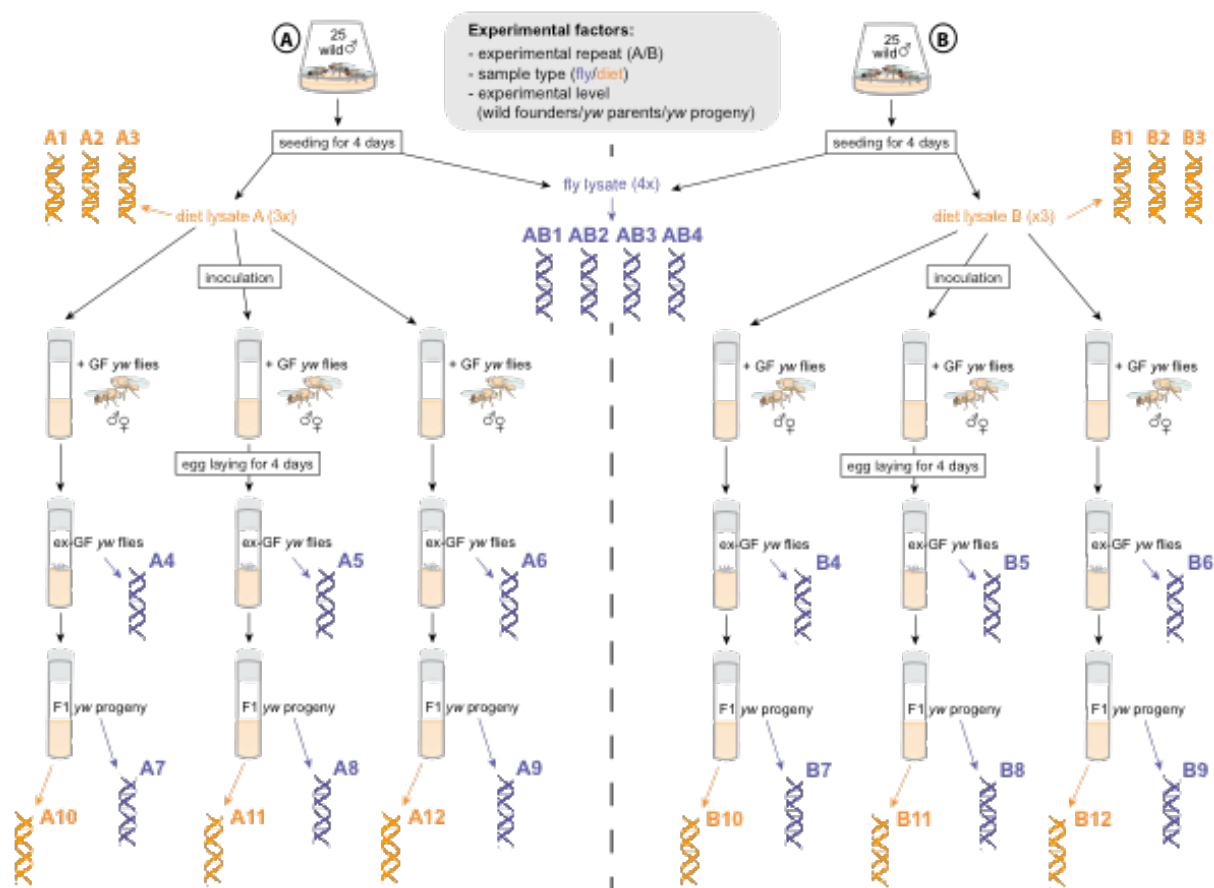

608

609 **Figure 3. Schematic representation of the wild microbiota inoculation protocol and**  
 610 **sample collection.** Fly-derived DNA samples are represented in blue and diet-derived DNA  
 611 samples are represented in yellow. The contribution of the experimental factors was  
 612 statistically assessed with a type III ANOVA test. Such factors include the experimental  
 613 repeat (replicate experiments A and B), the nature of the samples (fly samples and diet  
 614 samples), as well as the experimental level (wild founders, y,w parents or y,w progeny). Note  
 615 that the entire protocol was performed on YSexp diets.



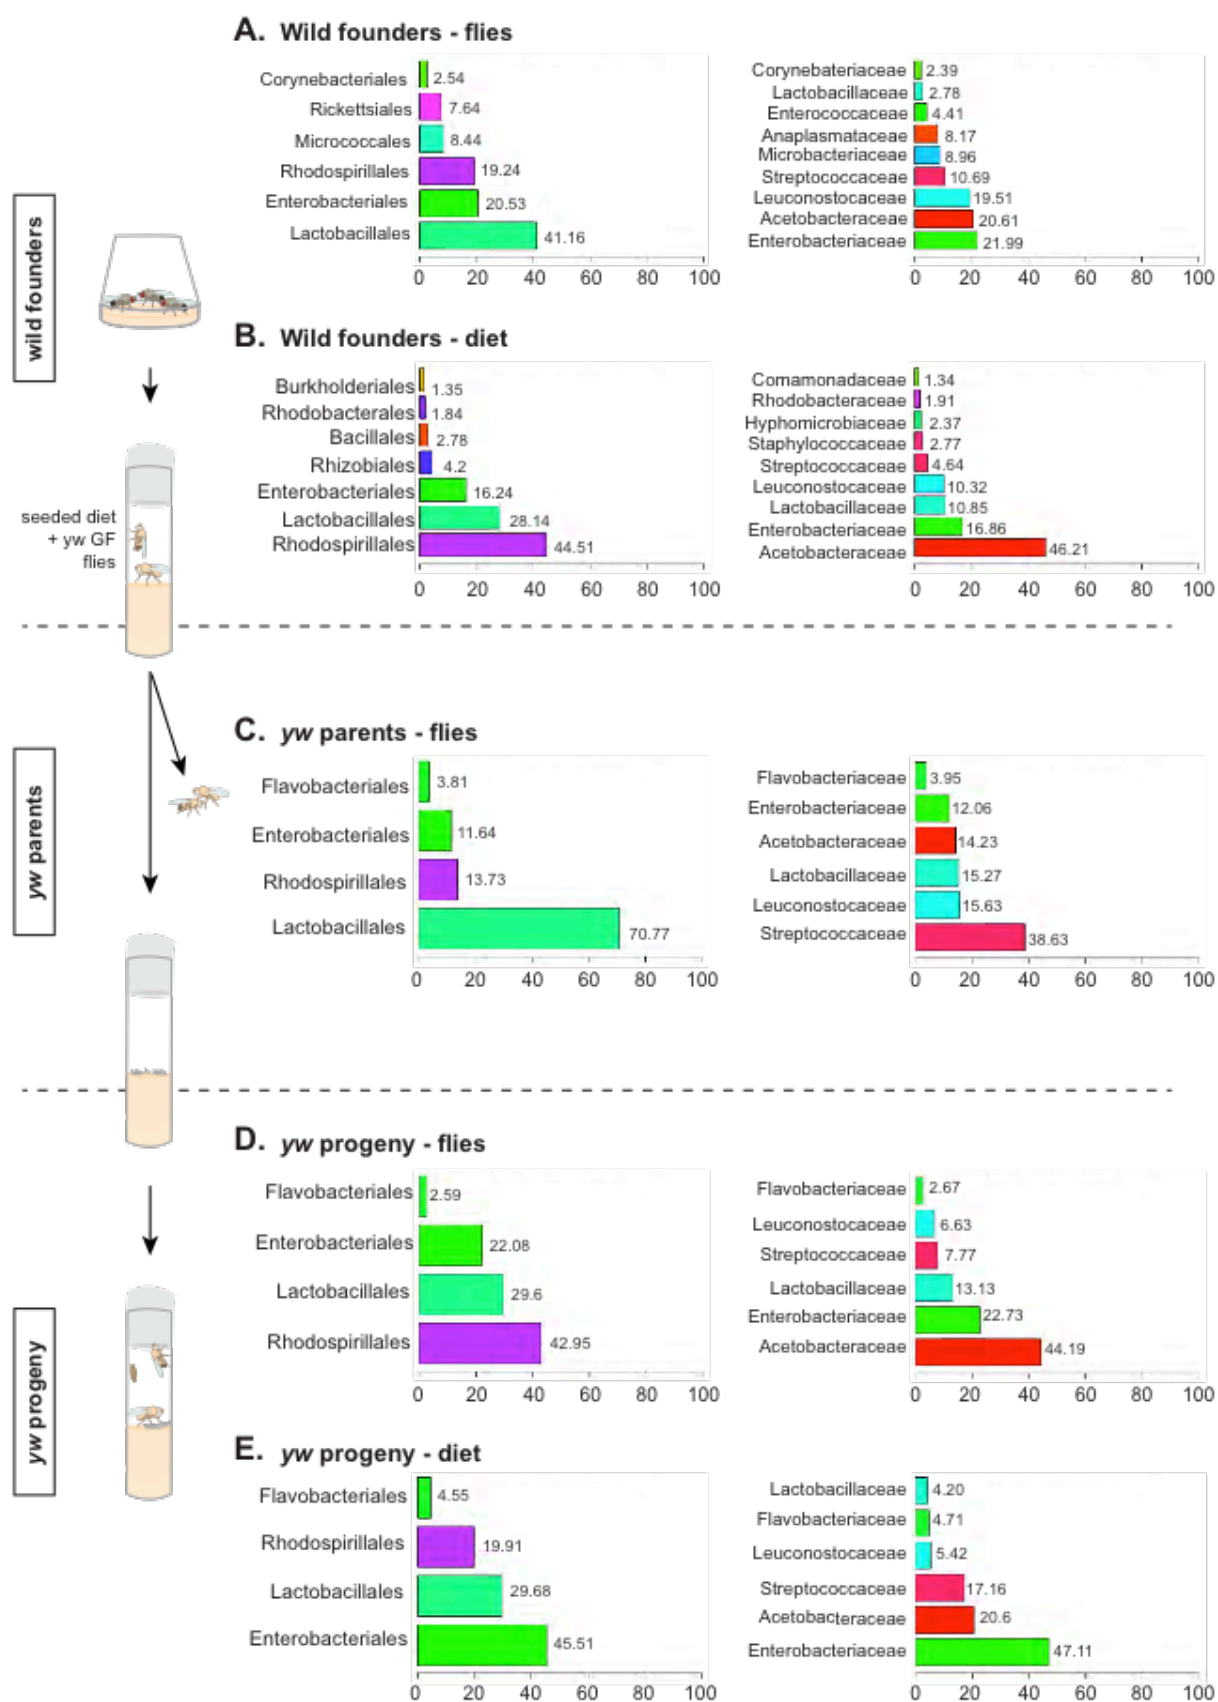

616  
617  
618  
619

**Figure 4. Bacterial communities associated with flies or diet upon transfer between populations and generations.** Frequency of represented bacterial Orders and Families (left and right panels, respectively) in each sample group (pooled replicates) corresponding to the

620 wild founder males (A, flies and B, diet), the  $y,w$  parents (C, flies) and the  $y,w$  progeny (D,  
621 flies and E, diet) levels. Equivalent percentages are indicated next to the corresponding bars.  
622 Graphs only represent the taxa present at a frequency of 1% or above.  
623

624

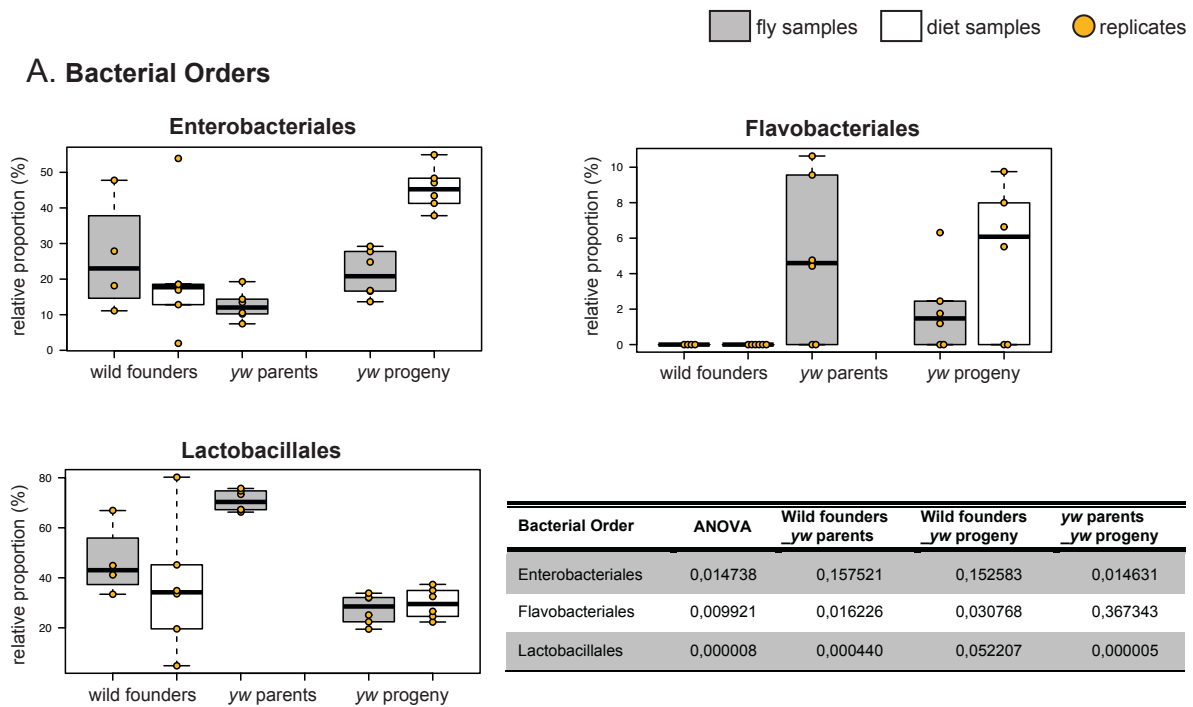

### B. Bacterial Families

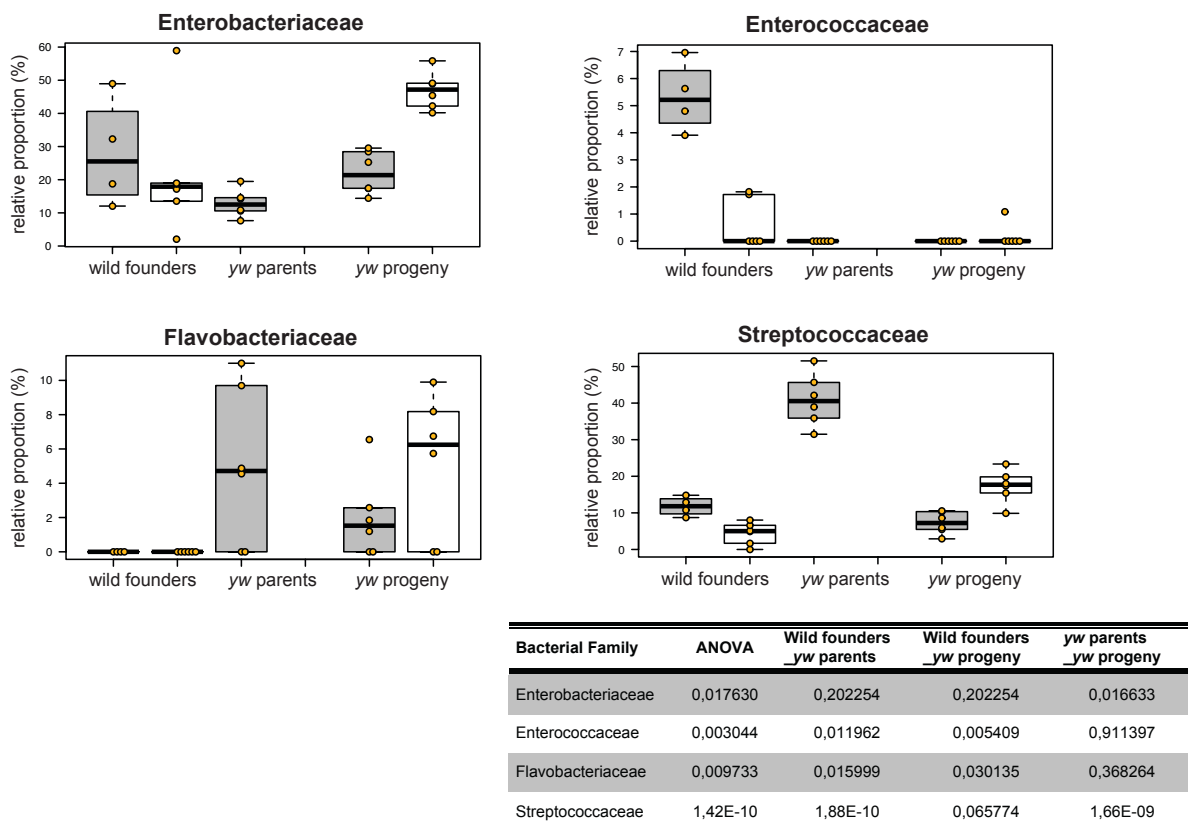

625

626

627

**Figure 5. Significantly differentially represented bacterial taxa.** The proportion of each bacterial Order (A) and Family (B) with significantly different representation across samples

628 is given for each combination of sample type (fly/diet) and experimental level (wild  
629 founders/ $y,w$  parents/ $y,w$  progeny). The results of the statistical analyses are summarized in  
630 the corresponding tables, with p-values of the type III ANOVA and subsequent pairwise-t-  
631 tests between modalities.

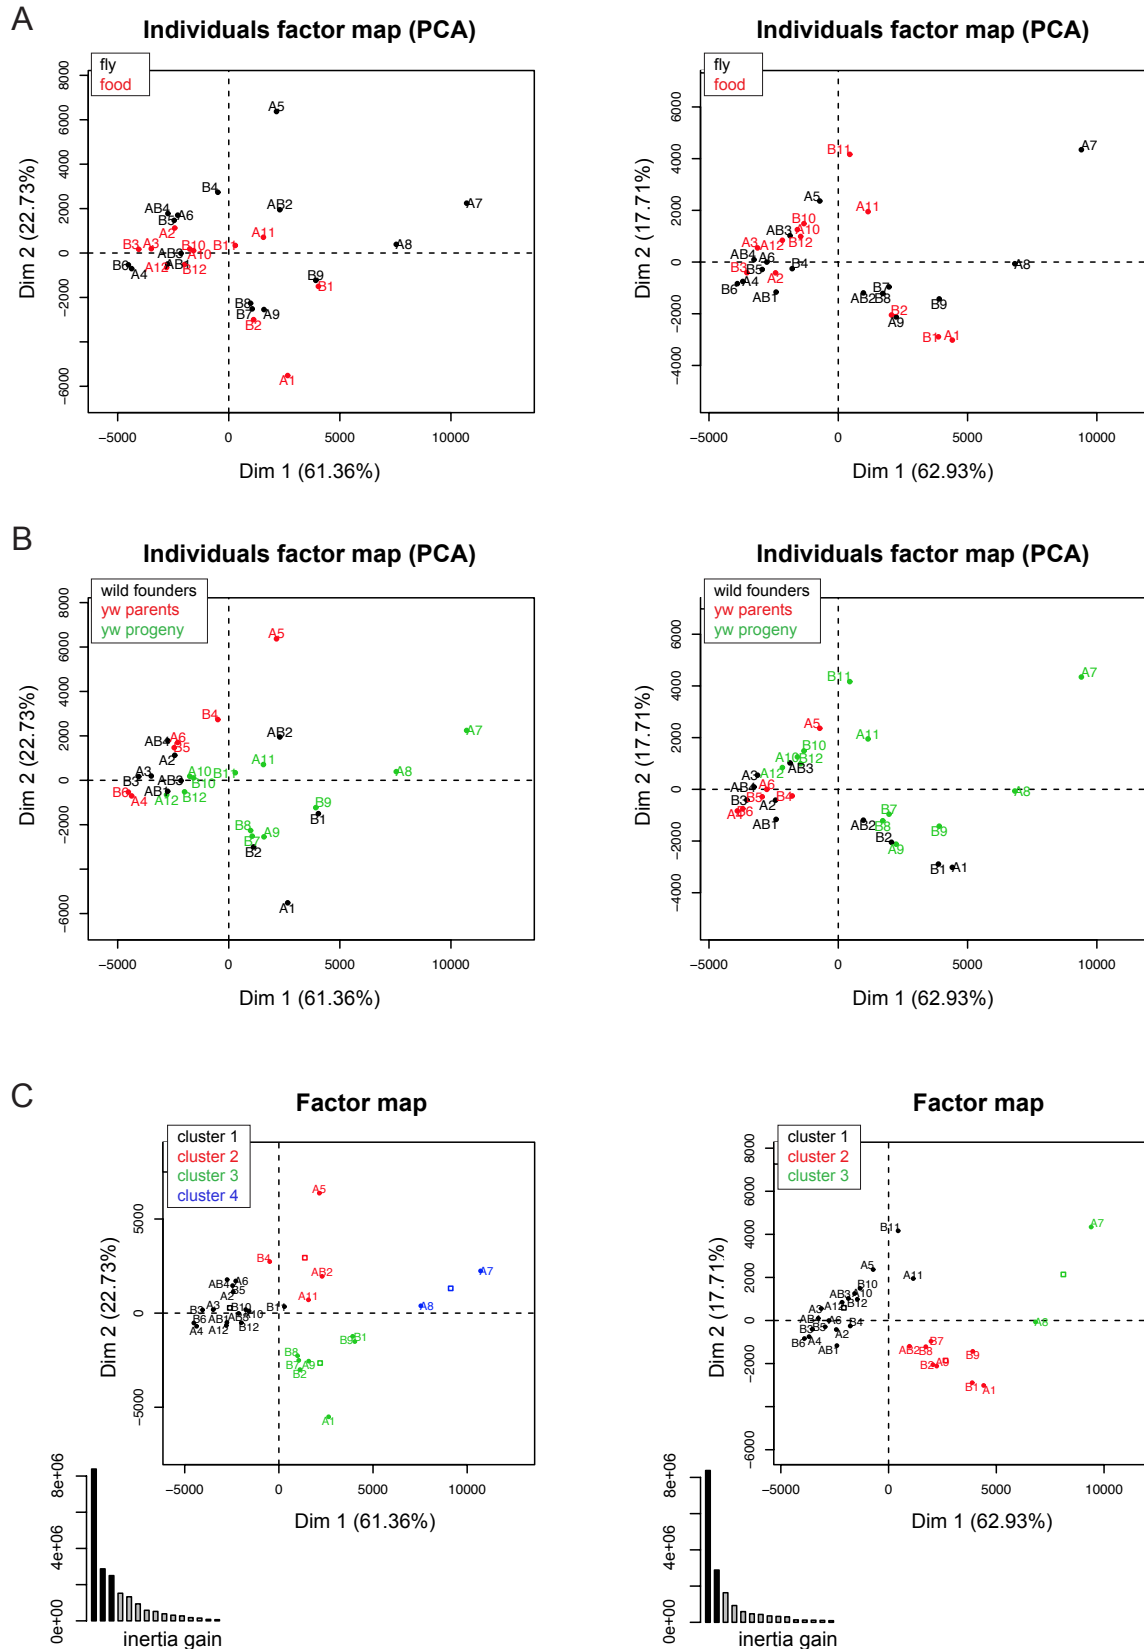

**Figure 6. Differences in composition among bacterial communities are not explained by the type of sample or the experimental level.** Principal component analyses results are shown for the bacterial Orders and Families (left and right panels, respectively). Samples

636 have been color-coded according to their type (A, fly/diet) or their experimental level (B, wild  
637 founders/*y,w* parents/*y,w* progeny). Panels C show in different colors the clusters resulting  
638 from the hierarchical clustering on principal components, together with the corresponding  
639 inertia gain graphs.

640

641

642

| <b>Name</b>       | <b>Sequence</b>       |
|-------------------|-----------------------|
| <b>16S-338F</b>   | ACTCCTACGGGAGGCAGCAGT |
| <b>16S-700R</b>   | CGMATTTTCACCKCTACAC   |
| <b>barcode 09</b> | CAAGGATG              |
| <b>barcode 10</b> | CTCAACAG              |
| <b>barcode 11</b> | CGTAGCTA              |
| <b>barcode 12</b> | CATGAGCT              |
| <b>barcode 13</b> | CAGATCTG              |
| <b>barcode 14</b> | CCTACCAT              |
| <b>barcode 15</b> | CCGCAATA              |
| <b>barcode 16</b> | CTCACACT              |

643

644 **Table 1.** Sequences of primers and barcodes used for the PCR amplification and sample  
645 identification in 16S-based community profiling protocols.

646

|                         | Df | Sum of Sq | RSS       | AIC         | F value  | Pr(>F)   |
|-------------------------|----|-----------|-----------|-------------|----------|----------|
| <b>Bacterial Order</b>  |    |           |           |             |          |          |
| exp                     | 1  | 0         | 32        | 18          | 0        | 1        |
| sample.type             | 1  | 0,190476  | 32,190476 | 18,189912   | 0,130952 | 0,720899 |
| level                   | 2  | 6,266667  | 38,266667 | 21,722985   | 2,154167 | 0,139837 |
| exp:sample.type         | 1  | 1,523810  | 33,523810 | 19,488641   | 1,047619 | 0,317180 |
| exp:level               | 2  | 4,916667  | 36,916667 | 20,57367096 | 1,690104 | 0,207588 |
| sample.type:level       | 1  | 4,355556  | 36,355556 | 22,08355599 | 2,994444 | 0,097556 |
| exp:sample.type:level   | 1  | 6,4       | 38,4      | 23,834290   | 4,4      | 0,047648 |
| <b>Bacterial Family</b> |    |           |           |             |          |          |
| exp                     | 1  | 7,82E-14  | 47,333333 | 30,527324   | 3,63E-14 | 1,000000 |
| sample.type             | 1  | 0,047619  | 47,380952 | 30,559501   | 0,022133 | 0,883090 |
| level                   | 2  | 6,6       | 53,933333 | 32,704410   | 1,533803 | 0,237907 |
| exp:sample.type         | 1  | 1,523810  | 48,857143 | 31,541270   | 0,708249 | 0,409081 |
| exp:level               | 2  | 4,383333  | 51,716667 | 31,361414   | 1,018662 | 0,377487 |
| sample.type:level       | 1  | 1,088889  | 48,422222 | 31,255134   | 0,506103 | 0,484306 |
| exp:sample.type:level   | 1  | 3,6       | 50,933333 | 32,873014   | 1,673239 | 0,209242 |

647  
648 **Table 2.** Type III ANOVA results for the Order and Family taxonomic level. Statistical  
649 analyses were performed on all samples from the wild-derived microbiota profiling  
650 experiment. Significant p-values (< 0.05) are shown in blue.



651

|                         | p.value     | df |
|-------------------------|-------------|----|
| <b>Bacterial Order</b>  |             |    |
| level                   | 0,308393167 | 6  |
| experiment              | 0,379903741 | 6  |
| sample.type             | 0,44140872  | 3  |
| <b>Bacterial Family</b> |             |    |
| level                   | 0,162702193 | 4  |
| sample.type             | 0,373672699 | 2  |
| experiment              | 0,386327304 | 4  |

652  
653 **Table 3.** Chi2 test results for the Order and Family taxonomic level. Statistics were  
654 performed on the results of the hierarchical clustering on principal components analyses.

655  
656  
657

### A. Order

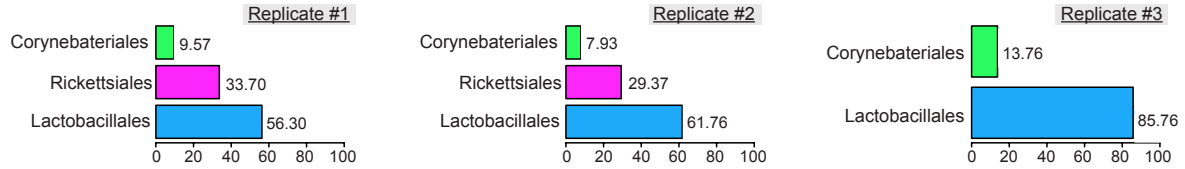

### B. Family

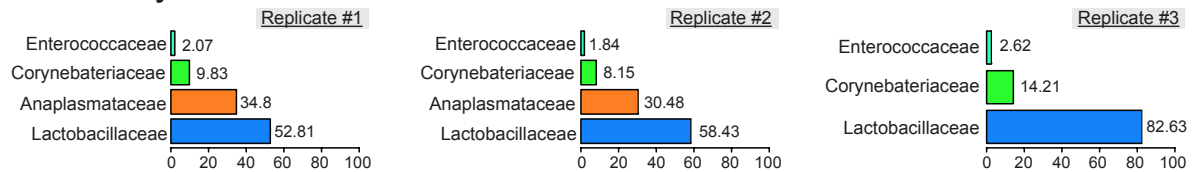

### C. Genus

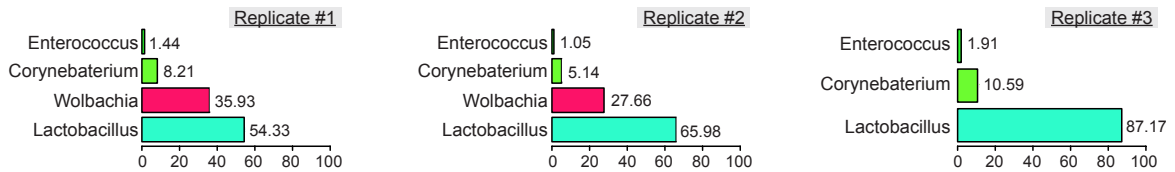

658  
659  
660  
661  
662

**Figure S1. Community profile of the yellow white stock microbiota.** Frequency of bacterial taxa present in each of the three biological replicates. Taxonomic levels used: Order (A), Family (B) and Genus (C). Equivalent percentages are indicated next to the corresponding bars. Graphs only represent the taxa present at a frequency of 1% or above.

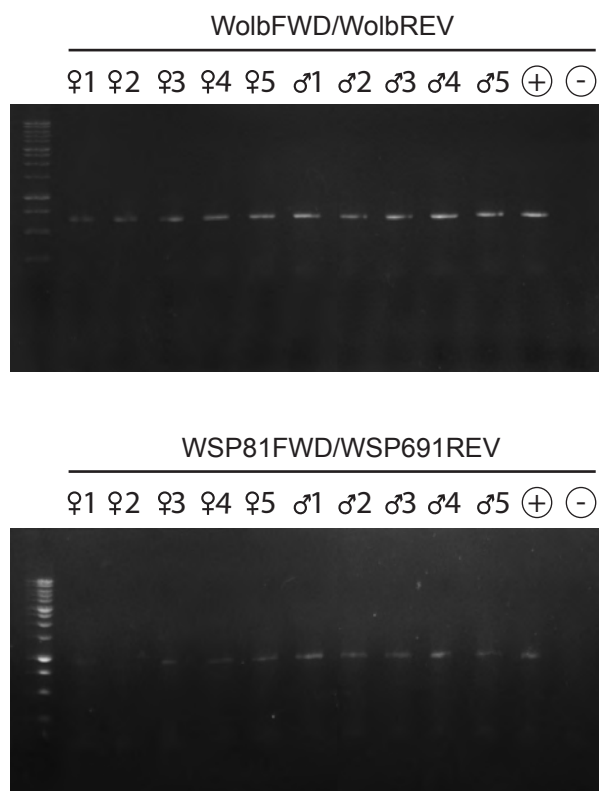

663

664 **Figure S2. The wild-derived *Drosophila* population is infected with *Wolbachia*.** Positive  
665 PCR result for *Wolbachia* presence. The PCR amplification was performed with general  
666 (upper gel) and strain-specific (lower gel) primer pairs.
